# Supplementary material
Source: PubMed Central journal article supplement (PMC5636781)

**A. Adaptive Gating Strategy**

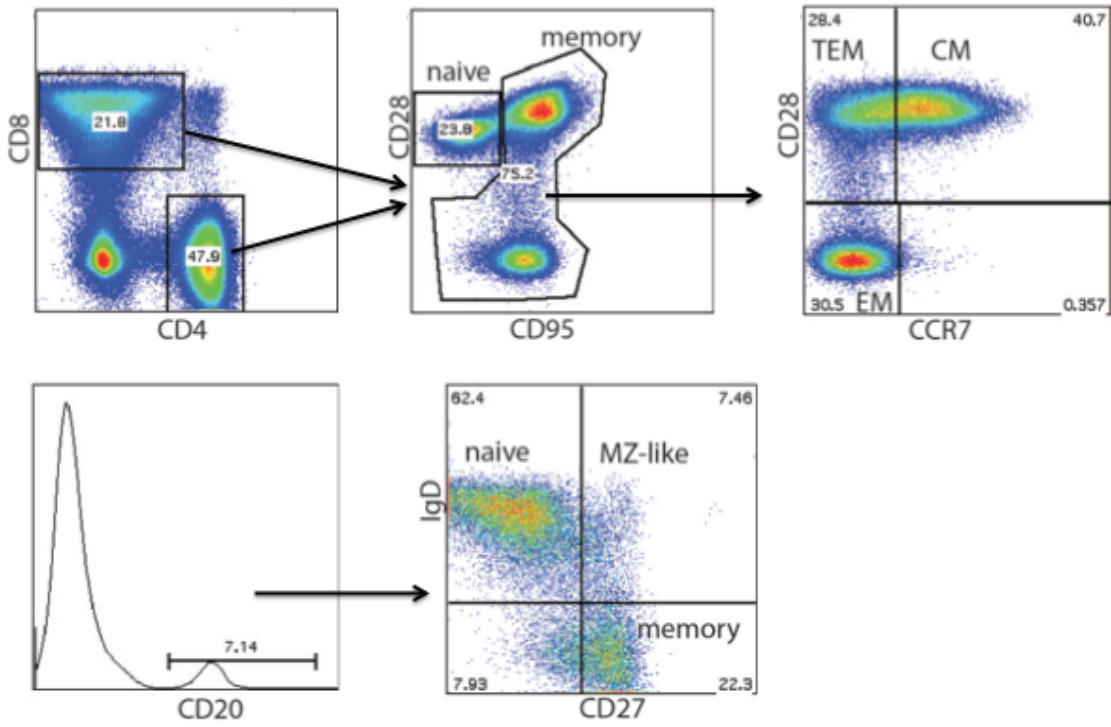

**B. Innate Gating Strategy**

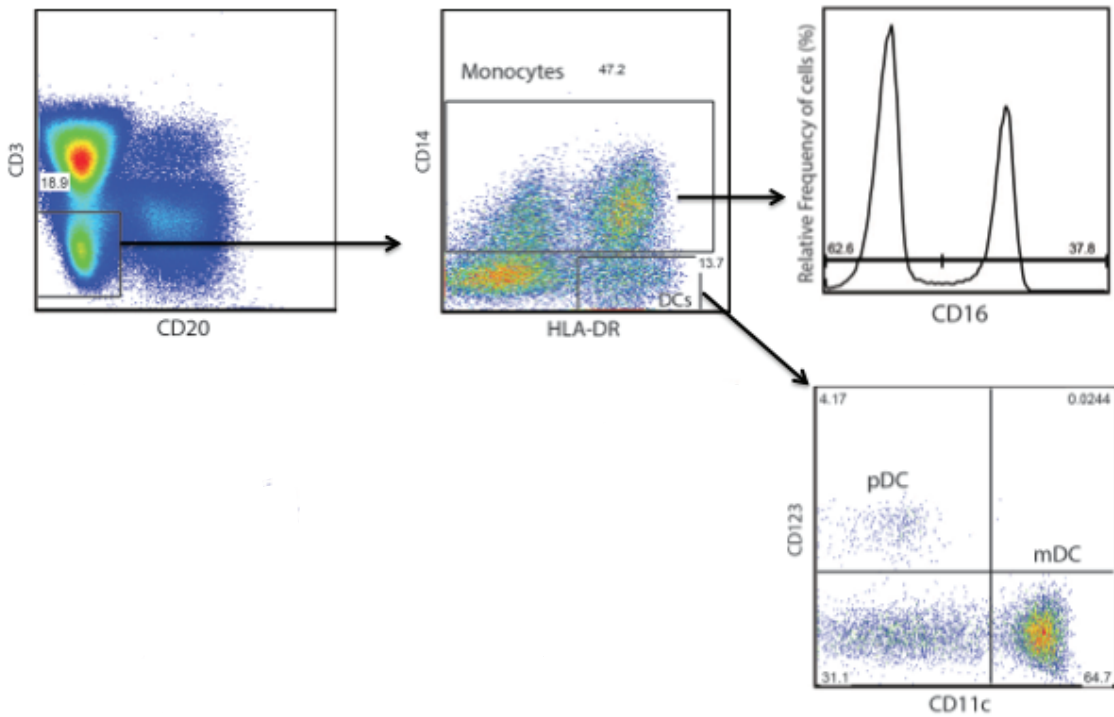

**C. T cell Stimulation and ICS**

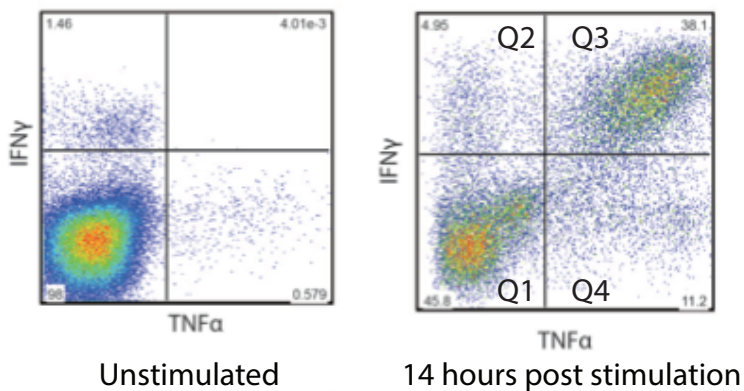

Supplement: 11357_2017_9979_MOESM1_ESM.pdf [file 11357_2017_9979_MOESM1_ESM.pdf]

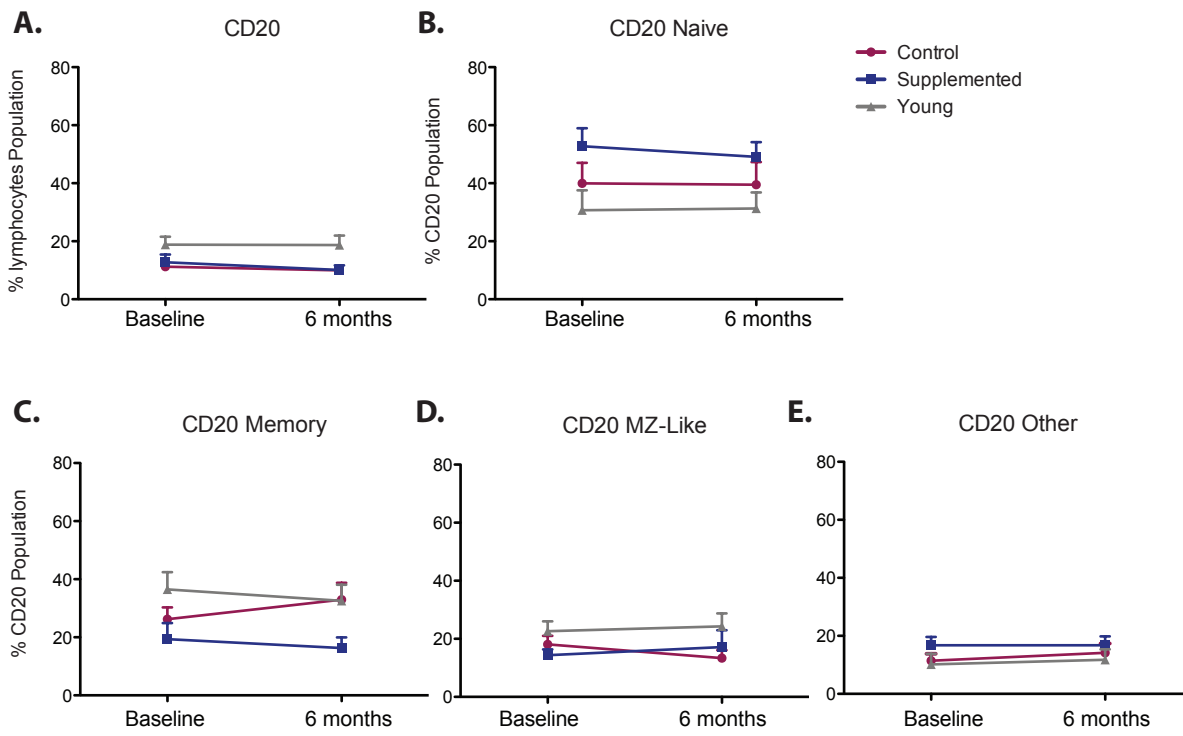

**Supplemental Figure 2**

Supplement: 11357_2017_9979_MOESM2_ESM.pdf [file 11357_2017_9979_MOESM2_ESM.pdf]

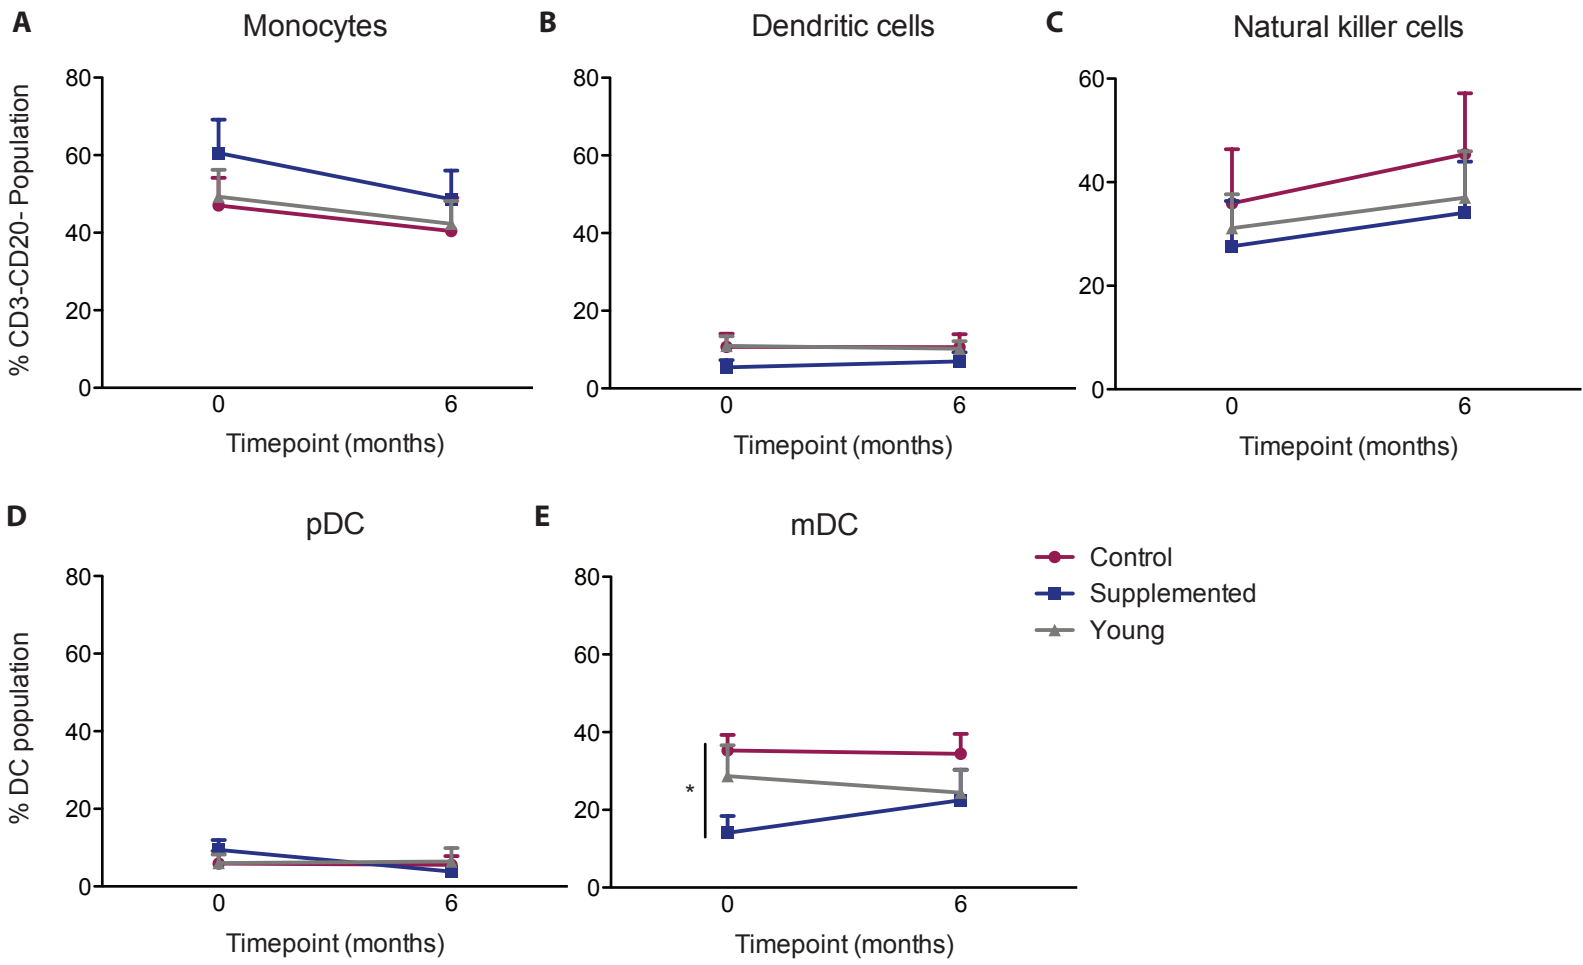

**Supplemental Figure 3**

Supplement: 11357_2017_9979_MOESM3_ESM.pdf [file 11357_2017_9979_MOESM3_ESM.pdf]
